# Supplementary material for: Tumour immune characterisation of primary triple-negative breast cancer using automated image quantification of immunohistochemistry-stained immune cells
Source: PubMed Central journal article supplement (PMC11399404; doi:10.1038/s41598-024-72306-1), 2024-09-13
Supplement: 41598_2024_72306_MOESM1_ESM.pdf [file 41598_2024_72306_MOESM1_ESM.pdf]

Tumor immune characterisation of primary triple-negative breast cancer using automated image quantification of immunohistochemistry-stained immune cells

Suze Roostee<sup>1,2</sup>, Daniel Ehinger<sup>1,3</sup>, Mats Jönsson<sup>1</sup>, Bengt Phung<sup>1</sup>, Göran Jönsson<sup>1</sup>, Gottfrid Sjö Dahl<sup>3</sup>, Johan Staaf<sup>1,2,\*,\*\*</sup>, Mattias Aine<sup>1,\*,\*\*</sup>

Author's affiliations

1 Division of Oncology, Department of Clinical Sciences Lund, Lund University, Sweden

2 Division of Translational Cancer Research, Department of Laboratory Medicine, Lund University, Sweden

3 Department of Genetics, Pathology, and Molecular Diagnostics, Skåne University Hospital, Lund, Sweden

4 Department of Translational Medicine, Lund University, Malmö, Sweden

**Supplementary Table 2. IHC stainings performed for this study.**

| Antibody     | Supplier     | Cat no  | Clone   | Dilution | Pretreatment                | Visualisation                  | Incubation time |
|--------------|--------------|---------|---------|----------|-----------------------------|--------------------------------|-----------------|
| <i>p53</i>   | Santa Cruz   | sc-126  | DO-1    | 1:500    | Dako PT-Link<br>Buffer pH 9 | Dako<br>EnVision™Flex<br>K8010 | 30 min          |
| <i>FOXP3</i> | Abcam        | ab20034 | 236A/E8 | 1:200    | Dako PT-Link<br>Buffer pH 9 | Dako<br>EnVision™Flex<br>K8010 | 30 min          |
| <i>CD68</i>  | Dako/Agilent | M0814   | KP1     | 1:1000   | Dako PT-Link<br>Buffer pH 9 | Dako<br>EnVision™Flex<br>K8010 | 30 min          |
| <i>CD4</i>   | Dako/Agilent | M7310   | 4B12    | 1:200    | Dako PT-Link<br>Buffer pH 9 | Dako<br>EnVision™Flex<br>K8010 | 30 min          |
| <i>CD8</i>   | Dako/Agilent | M7103   | C8/144B | 1:100    | Dako PT-Link<br>Buffer pH 9 | Dako<br>EnVision™Flex<br>K8010 | 30 min          |
| <i>CD3</i>   | Dako/Agilent | M7254   | F7.2.38 | 1:200    | Dako PT-Link<br>Buffer pH 9 | Dako<br>EnVision™Flex<br>K8010 | 30 min          |

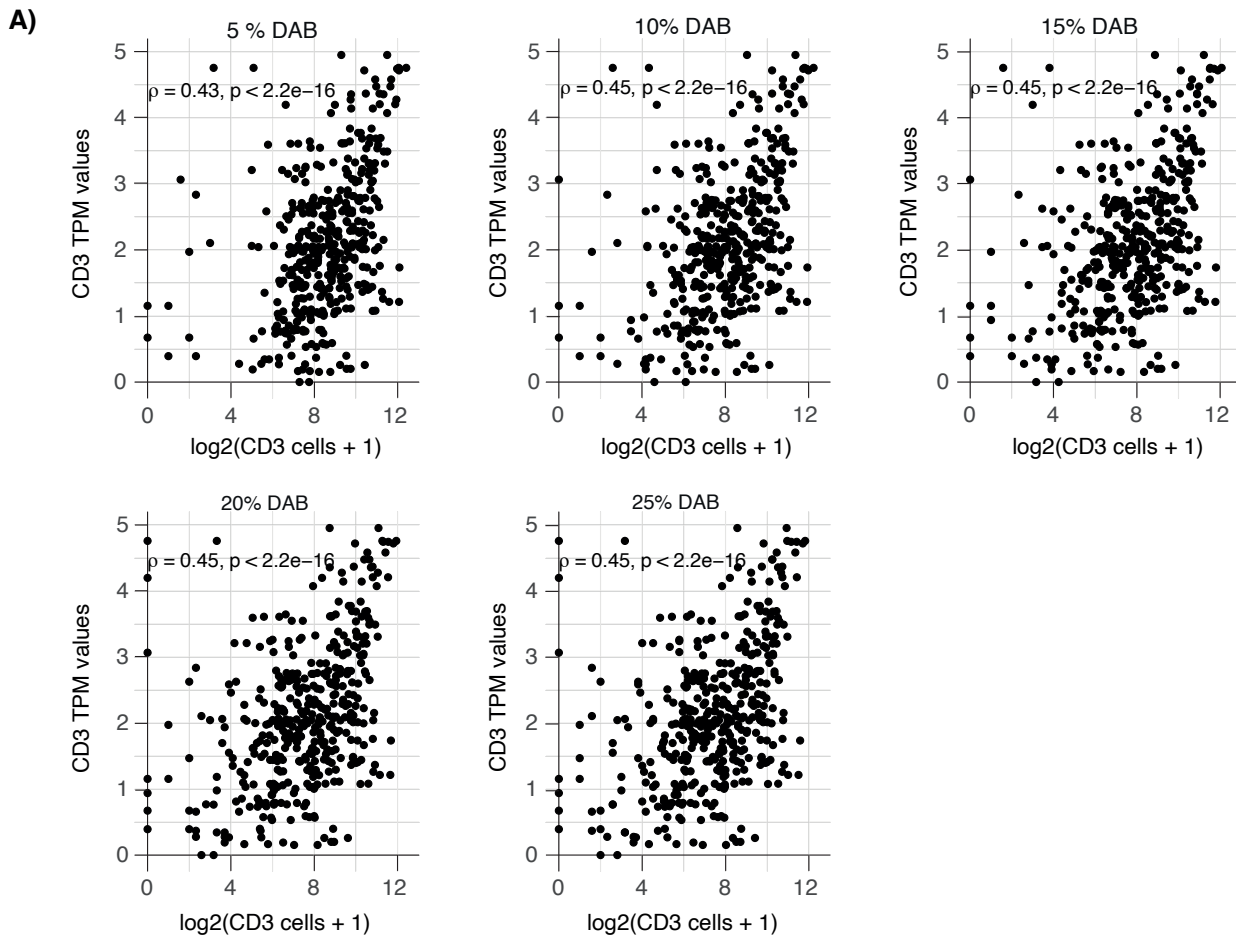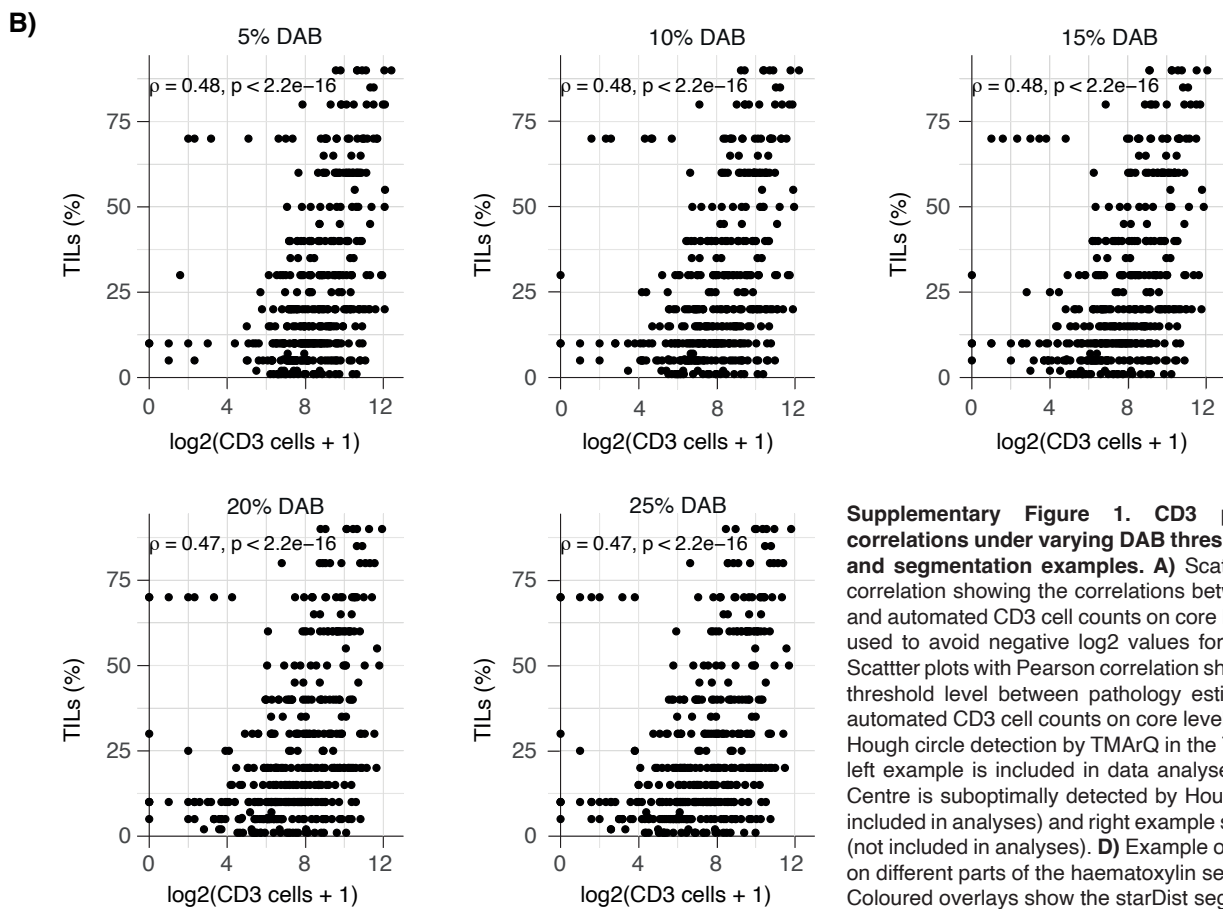

**Supplementary Figure 1. CD3 positive cell count correlations under varying DAB threshold levels, and circle and segmentation examples.** **A)** Scatter plots with Pearson correlation showing the correlations between CD3 TPM values and automated CD3 cell counts on core level. An offset of 1 was used to avoid negative log2 values for counts equal to 0. **B)** Scatter plots with Pearson correlation showing the effect of DAB threshold level between pathology estimated TIL scores and automated CD3 cell counts on core level. **C)** Three examples of Hough circle detection by TMArQ in the TNBC TMA cohort. The left example is included in data analyses and called correctly. Centre is suboptimally detected by Hough circle detection (not included in analyses) and right example should have been failed (not included in analyses). **D)** Example of starDist segmentation on different parts of the haematoxylin separated stain of a core. Coloured overlays show the starDist segmented nuclei.

C)

hough\_TNBC\_Block\_2\_block\_1\_334276\_3\_E\_CD3

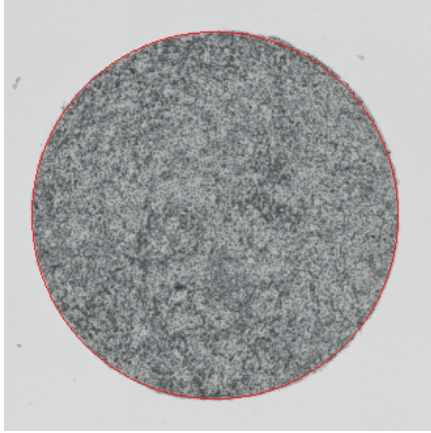

hough\_TNBC\_Block\_1\_block\_1\_334063\_5\_M\_CD3\_TNBC\_1A

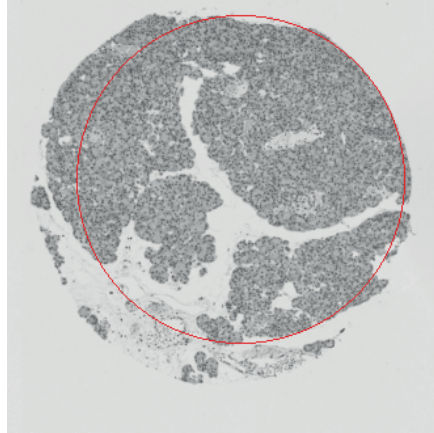

hough\_TNBC\_Block\_2\_block\_1\_334284\_3\_M\_CD3

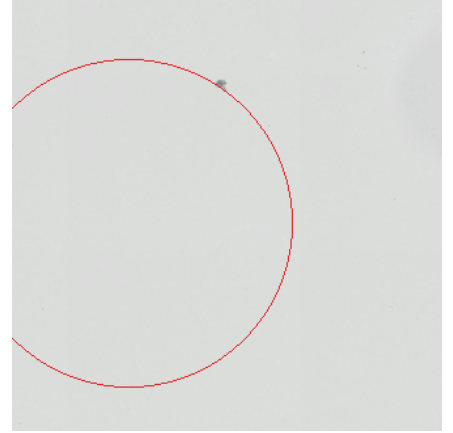

D)

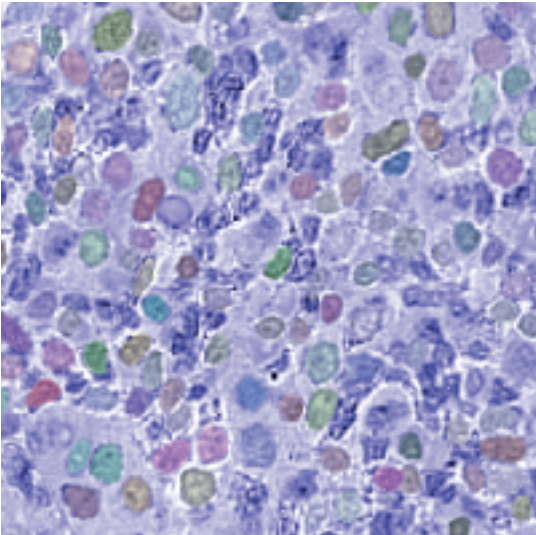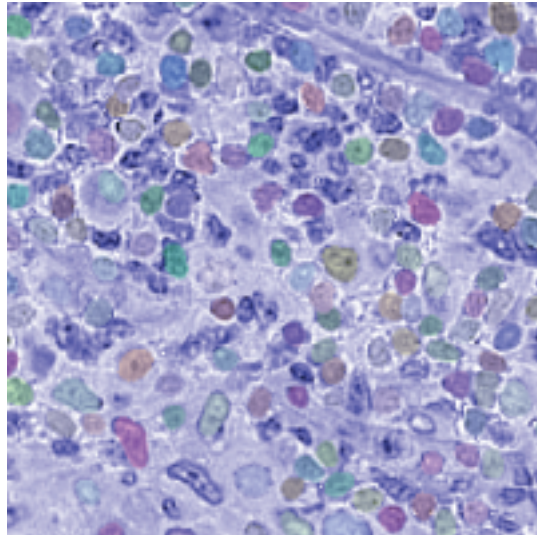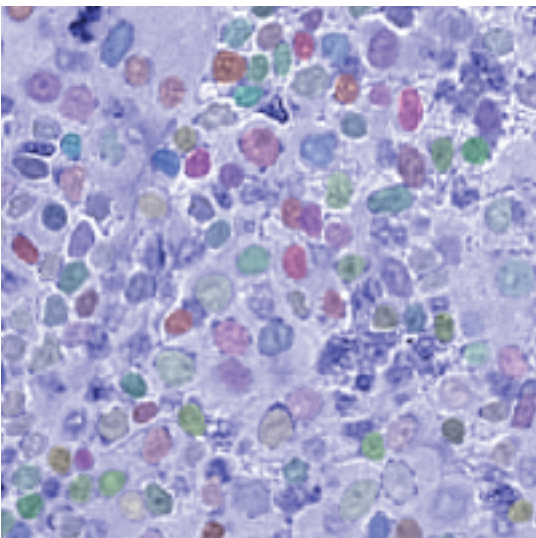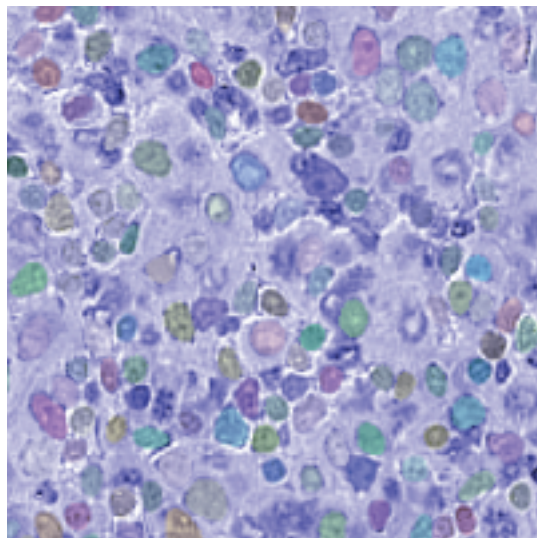

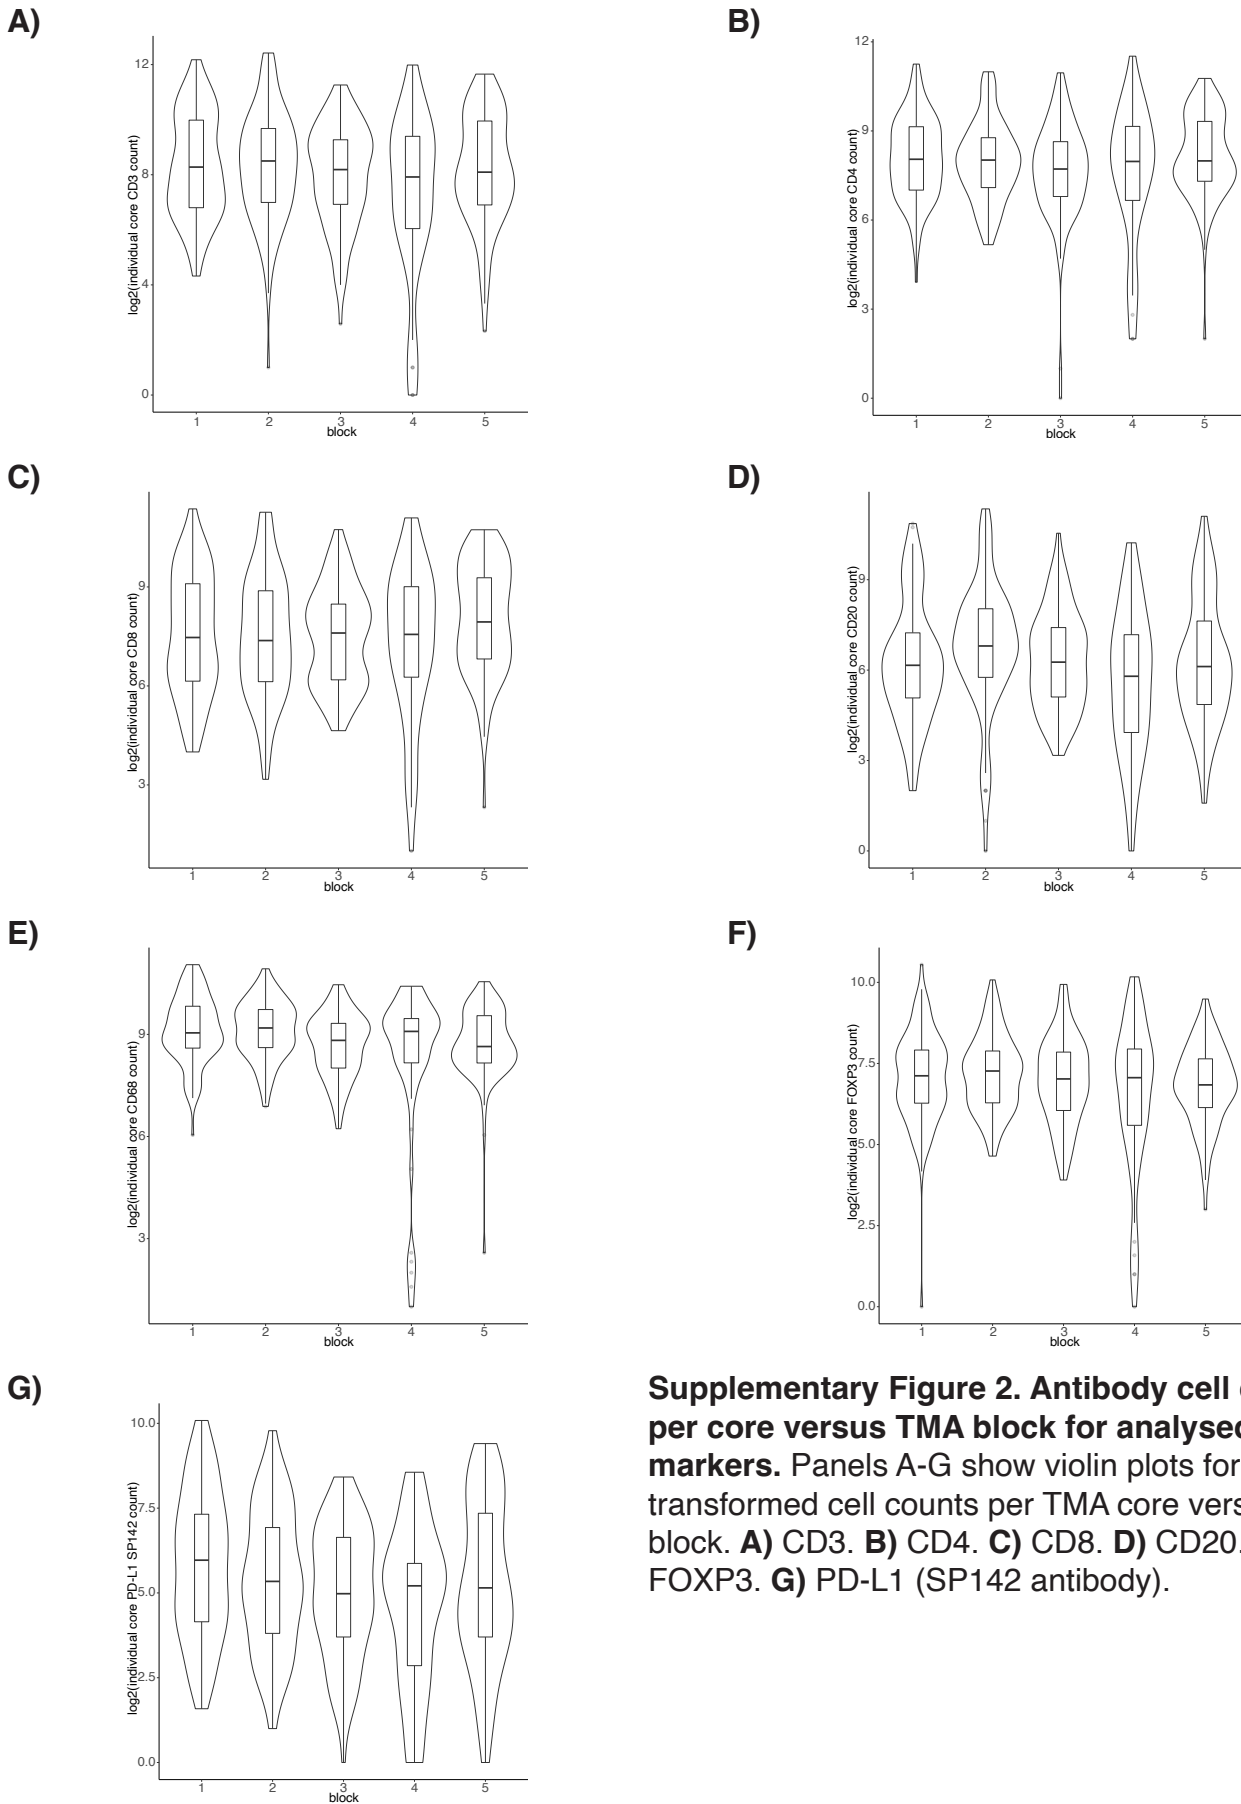

**Supplementary Figure 2. Antibody cell counts per core versus TMA block for analysed immune markers.** Panels A-G show violin plots for  $\log_2$  transformed cell counts per TMA core versus respective block. **A)** CD3. **B)** CD4. **C)** CD8. **D)** CD20. **E)** CD68. **F)** FOXP3. **G)** PD-L1 (SP142 antibody).

**A)**

|                     | CIBERSORT B-cell | CIBERSORT T-cell | CIBERSORT macrophage | Summed total fraction |
|---------------------|------------------|------------------|----------------------|-----------------------|
| CD3-ratio           | 0.35             | 0.26             | 0.13                 | 0.41                  |
| CD4-ratio           | 0.27             | 0.19             | 0.04                 | 0.27                  |
| CD8-ratio           | 0.34             | 0.27             | 0.10                 | 0.39                  |
| CD20-ratio          | 0.25             | 0.21             | 0.03                 | 0.24                  |
| CD68-ratio          | 0.21             | 0.18             | 0.11                 | 0.28                  |
| FOXP3-ratio         | 0.20             | 0.13             | 0.02                 | 0.18                  |
| PD-L1-ratio (SP142) | 0.30             | 0.29             | 0.15                 | 0.38                  |

**B)**

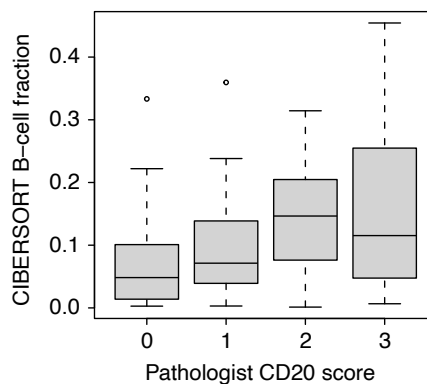

**C)**

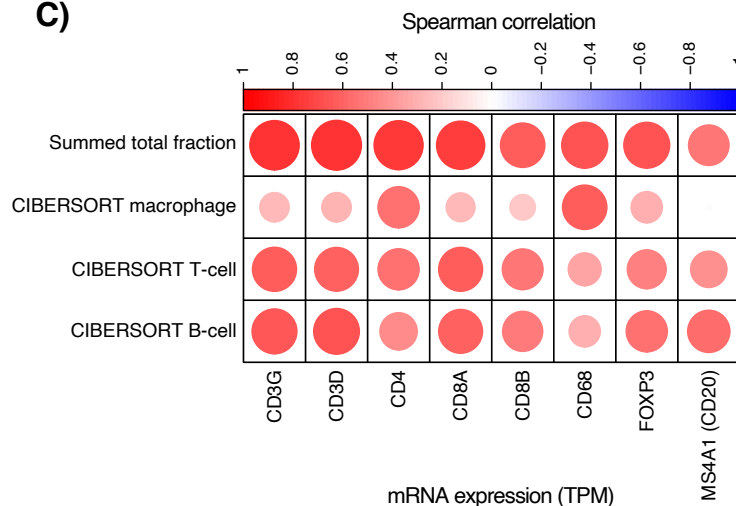

**D)**

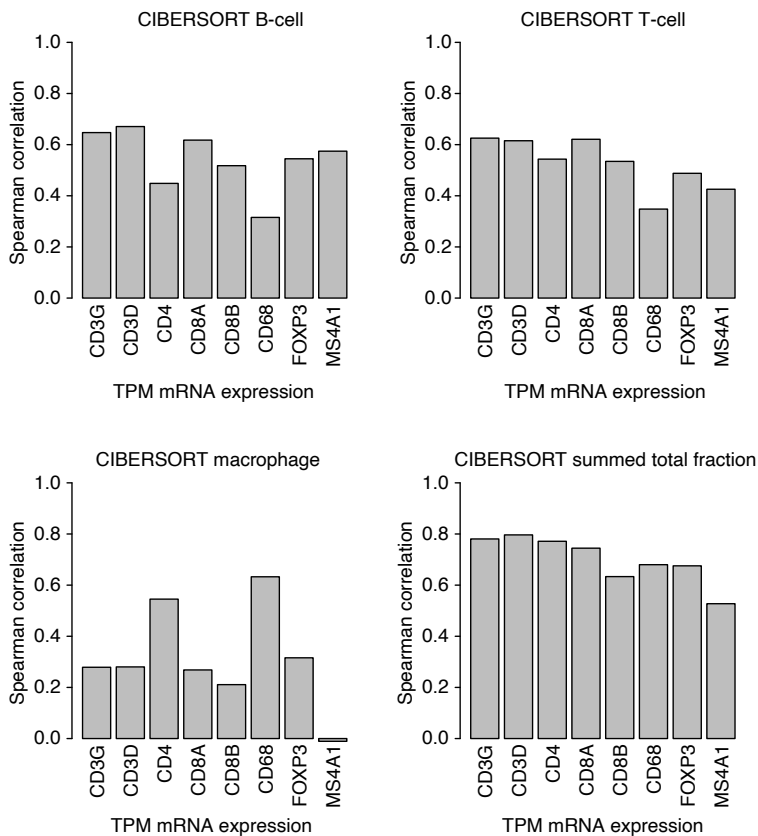

**Supplementary Figure 3. Comparisons of CIBERSORT estimates versus pathologist scores and RNA-sequencing data.** **A)** Spearman correlation table showing the correlation between CIBERSORT cell estimates and cell count ratios on a core level for investigated antibodies. Cell count ratios were computed as number of stained cells / total number of cell per core. **B)** CIBERSORT B-cell estimates versus pathologist CD20 scoring. **C)** Spearman correlation heatmap showing the correlation between CIBERSORT cell estimates and TPM expression for immune genes associated with cell types. **D)** Spearman correlation bar plots for data shown in panel C.

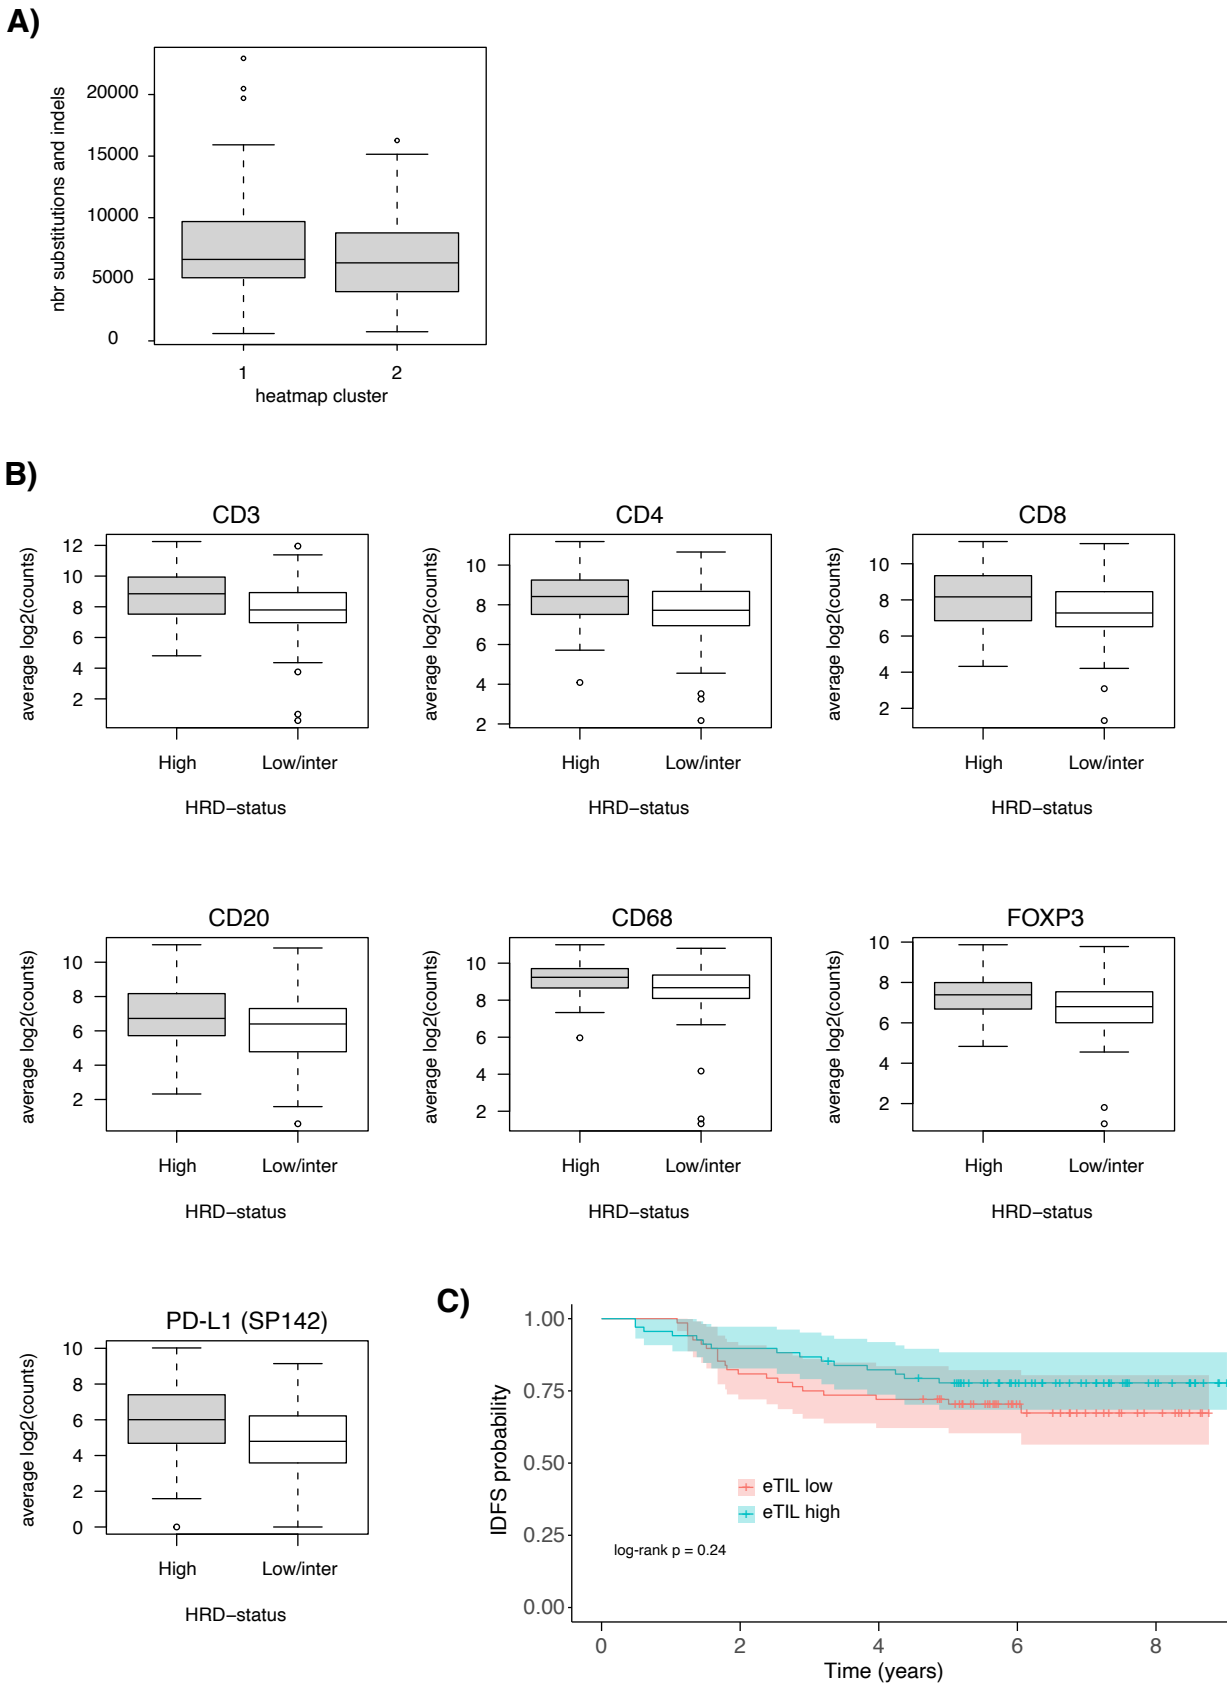

**Supplementary Figure 4. Mutational burden, automated antibody cell counts per sample versus WGS determined HRD-status, and AI-TILs analyses. A)** Total number of single nucleotide substitutions and indels for HRD-positive cases (by WGS) divided by the two heatmap clusters defined in main Figure 4. **B)** Automated antibody cell counts for immune markers versus HRD-status from WGS. Displayed counts represents the average value from both TMA cores for a tumor. **C)** Association with IDFS for chemotherapy treated patients for eTILs groups (low/high, by median) using data from Bai et al. on the the TMA cohort patients.

**A)**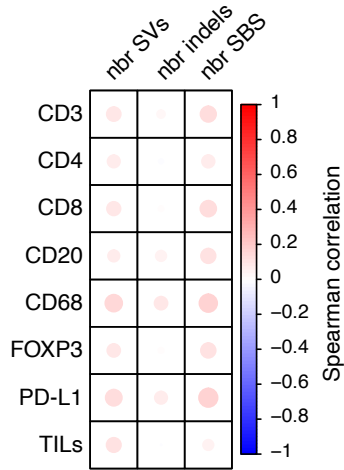**D)**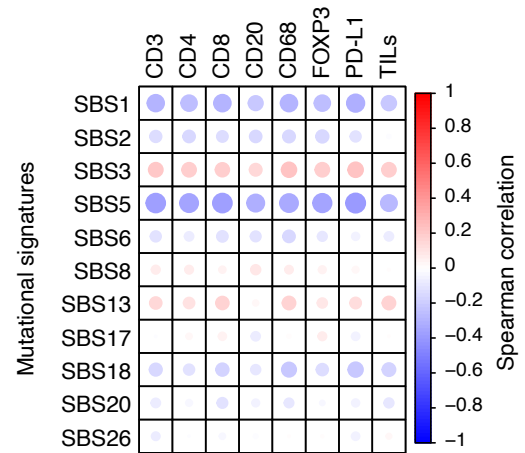**B)**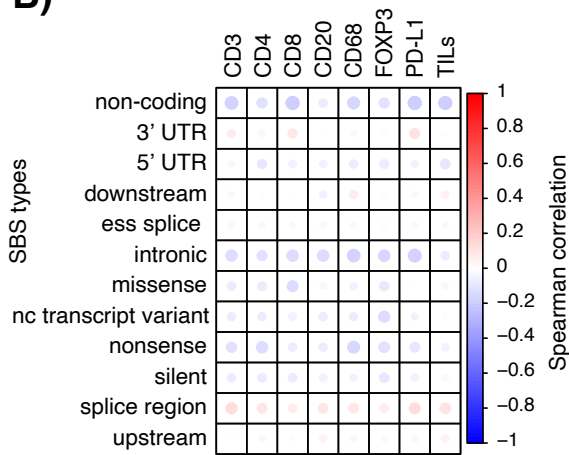**E)**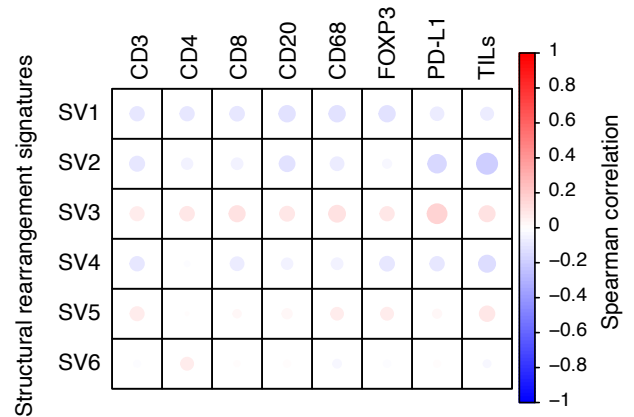**C)**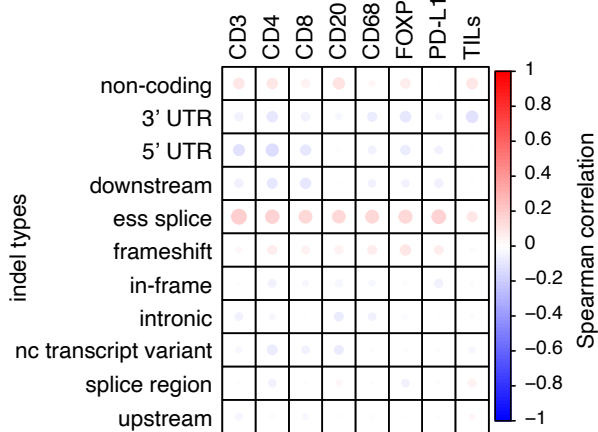**F)**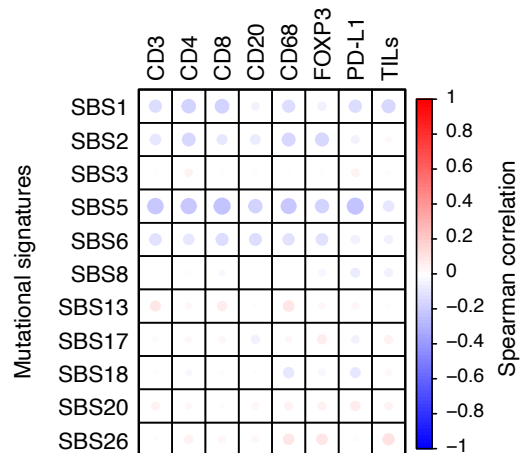

**Supplementary Figure 5. Association of TMArQ immune marker cell counts with genetic alterations and mutational signatures in TNBC.** Spearman correlation of immune cell counts and TILs versus **A)** total number of single base pair substitutions (SBSs), indels, and structural rearrangements (SVs) in all TNBCs, **B)** proportions of SBS types (number of a type divided by total number of SBSs) in all TNBCs, **C)** proportions of indel types (number of a type divided by total number of indels) in all TNBCs, **D)** SBS mutational signature exposures in all TNBCs, **E)** structural rearrangement signature (SVs) exposures in all TNBCs, and **F)** SBS signature exposures in HRD-positive TNBCs only.
